# Supplementary material for: Single-Species Microarrays and Comparative Transcriptomics
Source: PLoS One. 2008 Sep 25;3(9):e3279. doi: 10.1371/journal.pone.0003279 (PMC2533705; doi:10.1371/journal.pone.0003279)
Supplement: Table S1 — Mean ranks of significantly upregulated genes when analyzed with gDNA probemasks. (0.03 MB XLS) [file pone.0003279.s002.xls]

## Sheet: Sheet1
Table S1. Mean rank of significantly upregulated genes based on analysis with gDNA probemasks.
XM/XL gNDA probemask
Interspecific comparisons		SUXL, RXL		SUXM,RXM		Significant?		SUXL, RXM		SUXM, RXL		Significant?
XLT-XMT		6500.81		5881.45		*		3347.12		3857.16		*
XLO-XMO		5987.95		5270.37		*		3367.62		3671.48		*
XLT-XMO		6196.22		5712.71		*		3629.89		3832.87		*
XLO-XMT		6376.34		5558.36		*		3170.47		3396.95		*
Hybrid to parental comparisons
XLT-H(XLXM)T		5694.84		5820.8				3755.03		3800.89
XMT-H(XLXM)T		6057.3		6550.47		*		4078.95		3632.7		*
Intraspecific comparisons
XLT_XLE		6141.28		6230.8				3958.61		4044.85
XLO-XLT11		5953.41		5825.09				4140.08		3971.01
XLT_XL0		5782.98		6099.74				3950.5		3859.57
XLT_XLT11		4096.76		3961.85				4010.96		4018.7
XLO-XLE		5993.74		5691.09		*		4253.59		4298.71
XLE-XLT11		6255.9		6094.82				4436		3859.17		*
XLT_XLB		6090.9		6140.64				4102.85		3985.85
XLB_XLE		6182.96		6202.34				3892.65		4053.71		*
XLB_XLO		5767.2		6040.61		*		3608.57		3691.1
XLB_XLT11		6176.21		6202.02				3823.68		3911.91
XB/XL gDNA probemask
Interspecific comparisons		SUXL, RXL		XUXB,RXB				SUXL, RXB		SUXB, RXL
XLT-XBT		1219.5		1164.1		*		632.986		782.213		*
XLB-XBB		1208.86		1188.41				702.256		871.239		*
XLT-XBB		1237.52		1203.21				648.949		788.593		*
XLB-XBT		1229.93		1188.21				676.881		821.469		*
Hybrid to parental comparisons
XLT-H(XLXB)T		1134.38		1201.45				776.127		835.052
XBT-H(XLXB)T		1170.26		1199.63				884.37		672.706		*
Intraspecific comparisons
XLT_XLE		1199.46		1198.04				753.48		781.358
XLT-XLT11		1189.72		1217.04				744.955		761.902
XLT-XLO		1143.16		1180.45				764.488		746.758
XLO-XLT11		1122.56		1138.53				746.737		758.029
XLO_XLE		1141.13		1069.3				797.771		806.066
XLE_XLT11		1224.63		1207.24				873.476		771.475		*
XLT_XLB		1206.75		1214.59				799.619		781.712
XLB_XLE		1213.88		1205.99				742.507		780.247
XLB_XLo		1138.57		1169.69				709.676		703.663
XLB_XLT11		1194.02		1205.58				732.047		758.013
The rank in XL (RXL), rank in XM (RXM) and rank in XB (RXB) of significantly upregulated genes in XL (SUXL), significantly upregulated genes in XM (SUXM), and significantly upregulated genes in XB (SUXB). Asterisks indicate significant differences after Bonferroni correction for two tests. Acronyms follow Table 2.
